# Supplementary material for: Gene expression profile associated with Asmt knockout-induced depression-like behaviors and exercise effects in mouse hypothalamus
Source: PubMed Central journal article supplement (PMC9284346; doi:10.1042/bsr20220800), 2022-07-14
Supplement: BSR-2022-0800_supp.pdf [file BSR-2022-0800_supp.pdf]

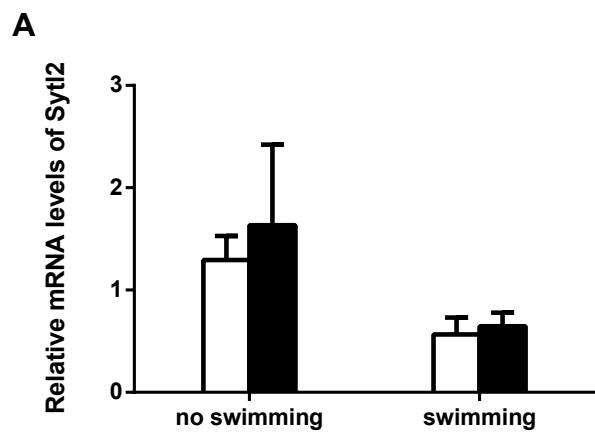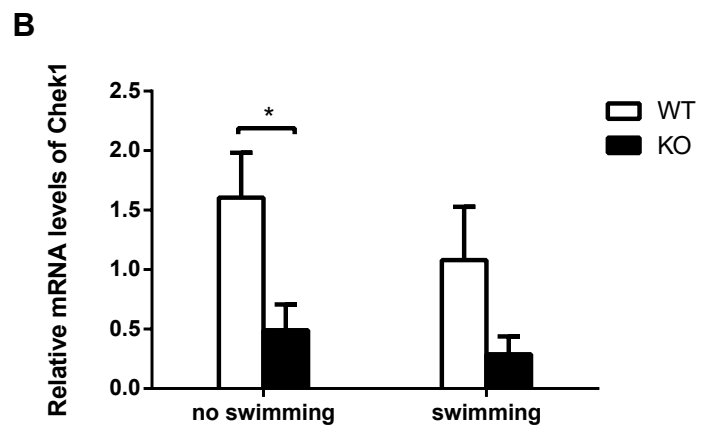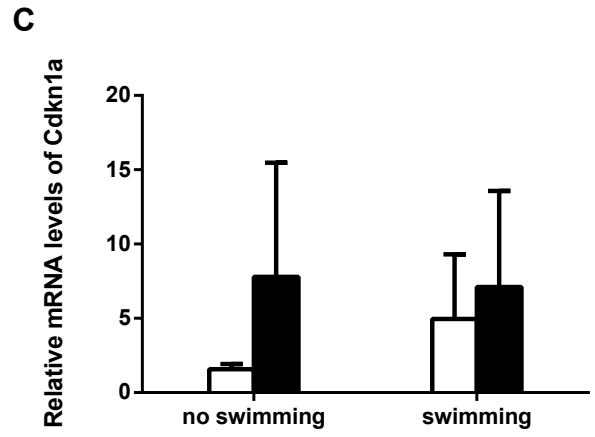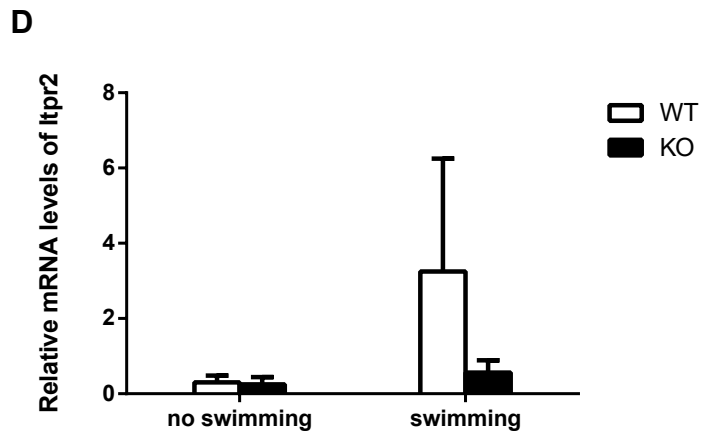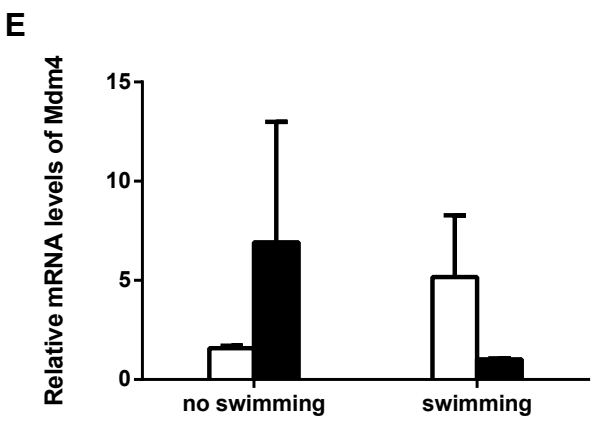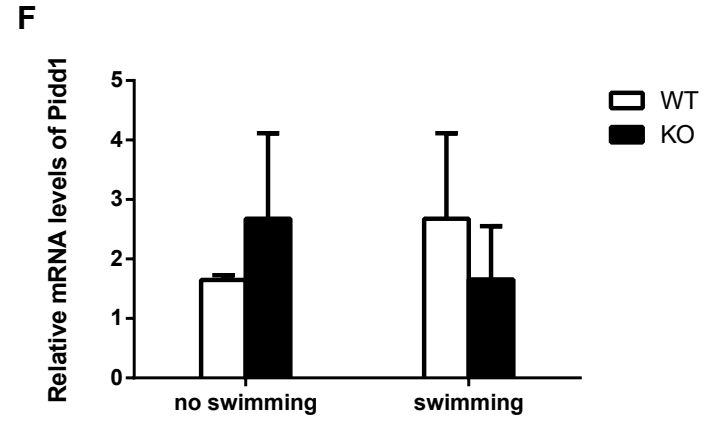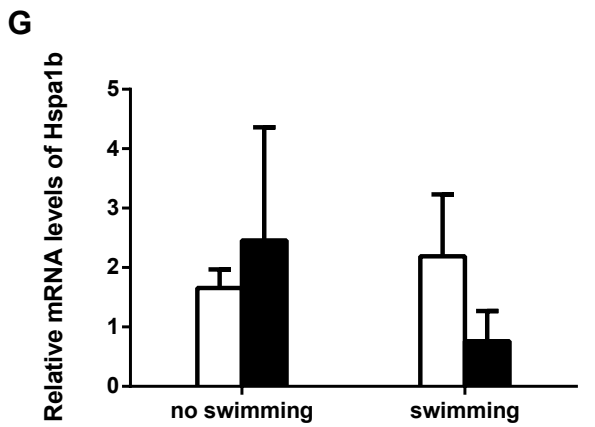

**Figure S1**

**Figure S1. Validation of DEGs by qRT-PCR.** The expression levels of the other seven genes in hypothalamus in response to Asmt knockout and swimming exercise. (A) synaptotagmin-like 2 (Styl2), (B) checkpoint kinase 1 (Chek1), (C) cyclin-dependent kinase inhibitor 1a (Cdkn1a), (D) inositol 1,4,5-triphosphate receptor 2 (Itpr2), (E) transformed mouse 3T3 cell double minute 4 (Mdm4), (F) p53 induced death domain protein 1 (Pidd1), and (G) heat shock protein 1b (Hspa1b). The relative mRNA levels was conducted using qRT-PCR. Data are presented as means  $\pm$  SEM (n = 3 per group). \*  $p < 0.05$  versus WT.

**Supplementary Table 1.** Gene-specific primers for quantitative real-time PCR.

| <b>Primer name</b> | <b>Sequence</b>                                                 |
|--------------------|-----------------------------------------------------------------|
| Eps811             | F: 5'-TCATTTGATCCCGGCTCGAT-3'<br>R: 5'-TCCCTTTCCCCATTCCCATC-3'  |
| Plcb2              | F: 5'-CTCTTCTCCTGTCCCCTGG-3'<br>R: 5'-TCTGCAAAGCTCCCAAGC-3'     |
| Syt12              | F: 5'-GGCCTAACCATCCACGAGAG-3'<br>R: 5'-GAATCGCTTGGGCTTGACAC-3'  |
| Chek1              | F: 5'-GAGAAAGGGAATTCTGAGGTG-3'<br>R: 5'-TGGTGGGTTTAATGTCCAGC-3' |
| Cdkn1a             | F: 5'-GGTGGGCTTATCTGGGATGG-3'<br>R: 5'-AAACAGGGATGTTTGGGGCT-3'  |
| Itpr2              | F: 5'-GGAAGAGAGGCCTGTCATGT-3'<br>R: 5'-GTGATGCTGCCATTCTCCAG-3'  |
| Mdm4               | F: 5'-GATCCTCCTGCCTGGCTTAC-3'<br>R: 5'-CACAGACAGTGCATGCAGAC-3'  |
| Pidd1              | F: 5'-CTTTGTCCCTCCACGAGTCC-3'<br>R: 5'-CCTGAGGAGCAGAGAAGTGC-3'  |
| Hspa1b             | F: 5'-CTGCTTGGGCACCGATTACT-3'<br>R: 5'-TCCCAGGCTACTGGAACACT-3'  |
| 18S                | F: 5'-GTAACCCGTTGAACCCCAT-3'<br>R: 5'-CCATCCAATCGGTAGTAGCG-3'   |

**Supplementary Table 2.** The overall results of DEGs.

| Comparison | Up-regulated DEGs | Down-regulated DEGs | Total |
|------------|-------------------|---------------------|-------|
| KO VS WT   | 7                 | 3                   | 10    |
| KE VS KO   | 17                | 12                  | 29    |
| WE VS WT   | 359               | 17                  | 376   |
| KE VS WT   | 455               | 29                  | 484   |
| KE VS WE   | 6                 | 18                  | 24    |

**Supplementary Table 3.** The DEGs between the KO and WT groups.

| Gene symbol                 | Gene name                                | <i>P</i> value | Fold change | RefSeq gene name |
|-----------------------------|------------------------------------------|----------------|-------------|------------------|
| <b>Up-regulated genes</b>   |                                          |                |             |                  |
| Mpp1                        | membrane palmitoylated protein 1         | 0.00806796     | 3.17        | AK165261         |
| Tspan1                      | tetraspanin 1                            | 0.00955007     | 3.80        | NM_133681        |
| Chek1                       | checkpoint kinase 1                      | 0.01303070     | 2.13        | NM_007691        |
| Tns4                        | tensin 4                                 | 0.01873418     | 2.06        | /                |
| Evx2                        | even skipped homeotic gene 2 homolog     | 0.03593857     | 2.18        | NM_007967        |
| Teddm2                      | transmembrane epididymal family member 2 | 0.03639276     | 2.31        | NM_178243        |
| Papln                       | proteoglycan-like sulfated glycoprotein  | 0.04980407     | 2.11        | NM_001205343     |
| <b>Down-regulated genes</b> |                                          |                |             |                  |
| Eps8l1                      | EPS8-like 1                              | 0.00422430     | -3.77       | NM_026146        |
| Plcb2                       | phospholipase C, beta 2                  | 0.01100710     | -8.11       | NM_177568        |
| Syt12                       | synaptotagmin-like 2                     | 0.03631679     | -2.35       | NR_110348        |

**Supplementary Table 4.** The DEGs between the KE and KO groups.

| <b>Gene symbol</b>          | <b>Gene name</b>                                                      | <b><i>P</i> value</b> | <b>Fold change</b> | <b>RefSeq gene name</b> |
|-----------------------------|-----------------------------------------------------------------------|-----------------------|--------------------|-------------------------|
| <b>Up-regulated genes</b>   |                                                                       |                       |                    |                         |
| Ift80                       | intraflagellar transport 80                                           | 0.00142910            | 5.60               | NM_026641               |
| Plekho2                     | pleckstrin homology domain containing, family O member 2              | 0.00238690            | 2.15               | AK172714                |
| Eps8l1                      | EPS8-like 1                                                           | 0.00304345            | 3.97               | NM_026146               |
| Oca2                        | oculocutaneous albinism II                                            | 0.00556511            | 5.86               | NM_021879               |
| Rab17                       | RAB17, member RAS oncogene family                                     | 0.00856209            | 4.51               | NM_008998               |
| Slc16a8                     | solute carrier family 16 (monocarboxylic acid transporters), member 8 | 0.01601820            | 2.01               | NM_020516               |
| Lima1                       | LIM domain and actin binding 1                                        | 0.01671470            | 2.62               | AK028311                |
| Tbc1d23                     | TBC1 domain family, member 23                                         | 0.02440666            | 2.01               | AK028852                |
| Tmem192                     | transmembrane protein 192                                             | 0.02603117            | 2.16               | AK090347                |
| Mdm4                        | transformed mouse 3T3 cell double minute 4                            | 0.02605572            | 2.18               | AK028493                |
| Slfn9                       | schlafen 9                                                            | 0.02928562            | 2.36               | NM_172796               |
| Pidd1                       | p53 induced death domain protein 1                                    | 0.03002435            | 2.04               | XM_006536220            |
| Frdm4b                      | FERM domain containing 4B                                             | 0.03248306            | 2.09               | AK051779                |
| Kcnq5                       | potassium voltage-gated channel, subfamily Q, member 5                | 0.03835360            | 2.55               | /                       |
| Syt12                       | synaptotagmin-like 2                                                  | 0.03854868            | 2.45               | NR_110348               |
| Bcl2a1c                     | B cell leukemia/lymphoma 2 related protein A1c                        | 0.04754736            | 2.03               | NM_007535               |
| Gla3                        | glycine receptor, alpha 3 subunit                                     | 0.04915356            | 2.59               | AK038618                |
| <b>Down-regulated genes</b> |                                                                       |                       |                    |                         |
| 8430408G22Rik               | RIKEN cDNA 8430408G22 gene                                            | 0.00433508            | -2.71              | NM_145980               |
| Hyal2                       | hyaluronoglucosaminidase 2                                            | 0.00851087            | -3.08              | AK087358                |
| Gm1070                      | predicted gene 1070                                                   | 0.01415500            | -2.72              | XR_105056               |
| Bcl11b                      | B cell leukemia/lymphoma 11B                                          | 0.01569456            | -2.09              | XM_006516114            |
| D930015E06Rik               | RIKEN cDNA D930015E06 gene                                            | 0.02218209            | -2.27              | NM_172681               |
| Rab19                       | RAB19, member RAS oncogene family                                     | 0.02307621            | -2.29              | NM_011226               |
| 1700001P01Rik               | RIKEN cDNA 1700001P01 gene                                            | 0.02428712            | -2.30              | NM_028156               |
| Ftcd                        | formiminotransferase cyclodeaminase                                   | 0.03222452            | -2.18              | NM_080845               |
| Itpr2                       | inositol 1,4,5-triphosphate receptor 2                                | 0.03246053            | -2.31              | /                       |
| Cdkn1a                      | cyclin-dependent kinase inhibitor 1A (P21)                            | 0.03963165            | -2.07              | NM_007669               |
| Hspa1b                      | heat shock protein 1B                                                 | 0.04467700            | -2.03              | NM_010478               |
| Veph1                       | ventricular zone expressed PH domain-containing 1                     | 0.04984868            | -2.14              | NM_145820               |

**Supplementary Table 5.** The top 10 DEGs between the WE and WT groups.

| <b>Gene symbol</b>          | <b>Gene name</b>                                                                                             | <b>P value</b> | <b>Fold change</b> | <b>RefSeq gene name</b> |
|-----------------------------|--------------------------------------------------------------------------------------------------------------|----------------|--------------------|-------------------------|
| <b>Up-regulated genes</b>   |                                                                                                              |                |                    |                         |
| Gm4788                      | predicted gene 4788                                                                                          | 0.00000243     | 7.46               | NM_001029977            |
| Lrp1b                       | low density lipoprotein-related protein 1B                                                                   | 0.00000593     | 6.59               | XM_006498459            |
| Ranbp1                      | RAN binding protein 1                                                                                        | 0.00000763     | 4.28               | AK151167                |
| Bex6                        | brain expressed gene 6                                                                                       | 0.00001760     | 8.10               | NM_001033539            |
| Pigb                        | phosphatidylinositol glycan anchor biosynthesis, class B                                                     | 0.00001830     | 2.67               | AK161911                |
| Spry4                       | sprouty homolog 4                                                                                            | 0.00002970     | 8.60               | NM_011898               |
| Nudt19                      | nucleoside diphosphate linked moiety X-type motif 19                                                         | 0.00003460     | 2.16               | NM_033080               |
| Ttc34                       | tetratricopeptide repeat domain 34                                                                           | 0.00003540     | 4.03               | XM_006538862            |
| Spint2                      | hepatocyte growth factor activator inhibitor type 2 (Hai2)                                                   | 0.00004560     | 5.34               | AF099016                |
| H2-Q1                       | histocompatibility 2, Q region locus 1                                                                       | 0.00005890     | 2.96               | NM_010390               |
| <b>Down-regulated genes</b> |                                                                                                              |                |                    |                         |
| Slc17a9                     | solute carrier family 17, member 9                                                                           | 0.00078700     | -2.29              | BC019537                |
| Krt6a                       | keratin 6A                                                                                                   | 0.00364642     | -3.32              | NM_008476               |
| St6galnac2                  | ST6(alpha-N-acetyl-neuraminyl-2,3-beta-galactosyl-1,3)-N-acetylgalactosaminide alpha-2,6-sialyltransferase 2 | 0.00383534     | -2.04              | NM_009180               |
| Slc35b3                     | solute carrier family 35, member B3                                                                          | 0.00445461     | -2.48              | AK167051                |
| Plcb2                       | phospholipase C, beta 2                                                                                      | 0.00472553     | -10.15             | NM_177568               |
| Col6a2                      | collagen, type VI, alpha 2                                                                                   | 0.00527168     | -2.98              | AK044870                |
| Gls                         | glutaminase                                                                                                  | 0.01436419     | -2.03              | AK046297                |
| Cabp5                       | calcium binding protein 5                                                                                    | 0.01656183     | -2.08              | NM_013877               |
| Veph1                       | ventricular zone expressed PH domain-containing 1                                                            | 0.02253773     | -2.37              | NM_145820               |
| Lrat                        | lecithin-retinol acyltransferase (phosphatidylcholine-retinol-O-acyltransferase)                             | 0.03409176     | -2.03              | NM_023624               |

**Supplementary Table 6.** The top 10 DEGs between the KE and WT groups.

| <b>Gene symbol</b>          | <b>Gene name</b>                                                                                    | <b><i>P</i> value</b> | <b>Fold change</b> | <b>RefSeq gene name</b> |
|-----------------------------|-----------------------------------------------------------------------------------------------------|-----------------------|--------------------|-------------------------|
| <b>Up-regulated genes</b>   |                                                                                                     |                       |                    |                         |
| Slc51b                      | solute carrier family 51, beta subunit                                                              | 0.00000138            | 5.70               | NM_178933               |
| Bex6                        | brain expressed gene 6                                                                              | 0.00000160            | 8.47               | NM_001033539            |
| Gfra4                       | glial cell line derived neurotrophic factor family receptor alpha 4                                 | 0.00000314            | 2.28               | NM_001271002            |
| Polr2l                      | polymerase (RNA) II (DNA directed) polypeptide L                                                    | 0.00000422            | 2.23               | NM_025593               |
| Lrig2                       | leucine-rich repeats and immunoglobulin-like domains 2                                              | 0.00000533            | 3.55               | AK158022                |
| Xylt1                       | xylosyltransferase 1                                                                                | 0.00000637            | 2.27               | NM_175645               |
| Herc1                       | hect (homologous to the E6-AP (UBE3A) carboxyl terminus) domain and RCC1 (CHC1)-like domain (RLD) 1 | 0.00000649            | 2.38               | AK035553                |
| Ranbp1                      | RAN binding protein 1                                                                               | 0.00000698            | 4.67               | AK151167                |
| 4930555G01Rik               | RIKEN cDNA 4930555G01 gene                                                                          | 0.00000956            | 2.96               | NM_175393               |
| Prickle1                    | prickle homolog 1 (Drosophila)                                                                      | 0.00001030            | 2.15               | NM_001033217            |
| <b>Down-regulated genes</b> |                                                                                                     |                       |                    |                         |
| Mybph                       | myosin binding protein H                                                                            | 0.00014600            | -2.32              | NM_016749               |
| Atrx                        | alpha thalassemia/mental retardation syndrome X-linked homolog                                      | 0.00025200            | -2.65              | AK172134                |
| Scfd2                       | sec1 family domain containing 2                                                                     | 0.00079800            | -2.02              | AK044408                |
| Hyal2                       | hyaluronidase 2                                                                                     | 0.00108229            | -3.93              | AK087358                |
| Slc35b3                     | solute carrier family 35, member B3                                                                 | 0.00144001            | -2.35              | AK167051                |
| Plxdc1                      | plexin domain containing 1                                                                          | 0.00183679            | -2.11              | AK040620                |
| Slc17a9                     | solute carrier family 17, member 9                                                                  | 0.00288047            | -2.09              | BC019537                |
| Plekhg3                     | pleckstrin homology domain containing, family G                                                     | 0.00312320            | -2.00              | AK080928                |
| Coll1a2                     | collagen, type XI, alpha 2                                                                          | 0.00315107            | -2.01              | NM_009926               |
| Gkap1                       | G kinase anchoring protein 1                                                                        | 0.00341408            | -2.27              | XM_011244543            |

**Supplementary Table 7.** The DEGs between the KE and WE groups.

| <b>Gene symbol</b>          | <b>Gene name</b>                                                         | <b>P value</b> | <b>Fold change</b> | <b>RefSeq gene name</b> |
|-----------------------------|--------------------------------------------------------------------------|----------------|--------------------|-------------------------|
| <b>Up-regulated genes</b>   |                                                                          |                |                    |                         |
| Oca2                        | oculocutaneous albinism II                                               | 0.002111519    | 5.74               | NM_021879               |
| Ino80d                      | INO80 complex subunit D                                                  | 0.003547891    | 2.01               | AK086434                |
| Rab17                       | RAB17, member RAS oncogene family                                        | 0.004100437    | 4.23               | NM_008998               |
| Slc15a2                     | solute carrier family 15 (H <sup>+</sup> /peptide transporter), member 2 | 0.005312482    | 3.56               | NM_021301               |
| Plekho2                     | pleckstrin homology domain containing, family O member 2                 | 0.022072747    | 2.16               | AK172714                |
| Tmem192                     | transmembrane protein 192                                                | 0.03725582     | 2.04               | AK090347                |
| <b>Down-regulated genes</b> |                                                                          |                |                    |                         |
| Pibf1                       | progesterone immunomodulatory binding factor 1                           | 0.004009988    | -2.18              | AK030385                |
| Gck                         | glucokinase                                                              | 0.006009245    | -2.56              | NM_001287386            |
| Tmco5                       | transmembrane and coiled-coil domains 5                                  | 0.007638294    | -2.92              | NM_026104               |
| Zkscan7                     | zinc finger with KRAB and SCAN domains 7                                 | 0.009346905    | -3.61              | NM_001177505            |
| Sp110                       | Sp110 nuclear body protein                                               | 0.009538312    | -2.00              | NM_175397               |
| Lyve1                       | lymphatic vessel endothelial hyaluronan receptor 1                       | 0.011785862    | -2.01              | NM_053247               |
| Ccdc77                      | coiled-coil domain containing 77                                         | 0.013087017    | -2.34              | NM_026028               |
| Lao1                        | L-amino acid oxidase 1                                                   | 0.013674419    | -2.23              | NM_133892               |
| Popdc3                      | popeye domain containing 3                                               | 0.014859548    | -2.36              | NM_024286               |
| Pctp                        | phosphatidylcholine transfer protein                                     | 0.015091728    | -2.99              | BC053478                |
| Bcl11b                      | B cell leukemia/lymphoma 11B                                             | 0.021204049    | -2.43              | XM_006516114            |
| Gpr150                      | G protein-coupled receptor 150                                           | 0.023718348    | -2.17              | NM_175495               |
| Egr3                        | early growth response 3                                                  | 0.026980145    | -2.05              | NM_001289925            |
| Zfyve28                     | zinc finger, FYVE domain containing 28                                   | 0.034588687    | -2.09              | NM_001015039            |
| Lag3                        | lymphocyte-activation gene 3                                             | 0.03522037     | -2.04              | NM_008479               |
| Tusc3                       | tumor suppressor candidate 3                                             | 0.035297345    | -3.98              | AK168664                |
| Ccr2                        | chemokine (C-C motif) receptor 2                                         | 0.036493722    | -2.17              | NM_009915               |
| Hpca                        | hippocalcin                                                              | 0.038588762    | -2.02              | BU504979                |



**Supplementary Table 8.** GO terms significantly enriched by Eps811 in the comparison of KO versus WT and KE versus KO groups.

| ID                        | GO term                                        | Regulation                   |                              |
|---------------------------|------------------------------------------------|------------------------------|------------------------------|
|                           |                                                | <i>P</i> value<br>(KO VS WT) | <i>P</i> value<br>(KE VS KO) |
| <b>Biological Process</b> |                                                |                              |                              |
| GO:1900029                | positive regulation of ruffle assembly         | 0.003287926                  | 0.009530627                  |
| GO:0016601                | Rac protein signal transduction                | 0.009368012                  | 0.026997436                  |
| <b>Cellular Component</b> |                                                |                              |                              |
| GO:0001726                | ruffle                                         | 0.034013467                  | 0.004371725                  |
| <b>Molecular Function</b> |                                                |                              |                              |
| GO:0030676                | Rac guanyl-nucleotide exchange factor activity | 0.006721637                  | 0.018217986                  |
| GO:0042608                | T cell receptor binding                        | 0.007678511                  | 0.020794221                  |

**Supplementary Table 9.** GO terms significantly enriched by Plcb2 between the KO and WT groups.

| ID                        | GO term                                                                       | Regulation                   |
|---------------------------|-------------------------------------------------------------------------------|------------------------------|
|                           |                                                                               | <i>P</i> value<br>(KO VS WT) |
| <b>Biological Process</b> |                                                                               |                              |
| GO:0050913                | sensory perception of bitter taste                                            | 0.003287926                  |
| GO:0001580                | detection of chemical stimulus involved in sensory perception of bitter taste | 0.014950453                  |
| GO:0016042                | lipid catabolic process                                                       | 0.046498252                  |
| <b>Cellular Component</b> |                                                                               |                              |
| GO:0005737                | cytoplasm                                                                     | 0.047224936                  |
| GO:0005829                | cytosol                                                                       | 0.489489852                  |
| <b>Molecular Function</b> |                                                                               |                              |
| GO:0004629                | phospholipase C activity                                                      | 0.004805373                  |
| GO:0004435                | phosphatidylinositol phospholipase C activity                                 | 0.008634546                  |
| GO:0031683                | G-protein beta/gamma-subunit complex binding                                  | 0.01197408                   |
| GO:0008081                | phosphoric diester hydrolase activity                                         | 0.02240329                   |
| GO:0005509                | calcium ion binding                                                           | 0.028870235                  |
| GO:0005543                | phospholipid binding                                                          | 0.039253587                  |

**Supplementary Table 10.** The top 10 enriched GO terms of DEGs between the KO and WT groups.

| <b>ID</b>                 | <b>GO term</b>                                                        | <b>Enriched genes</b> | <b>P value</b> |
|---------------------------|-----------------------------------------------------------------------|-----------------------|----------------|
| <b>Biological Process</b> |                                                                       |                       |                |
| GO:0050913                | sensory perception of bitter taste                                    | Plcb2                 | 0.003287926    |
| GO:1900029                | positive regulation of ruffle assembly                                | Eps811                | 0.003287926    |
| GO:0006975                | DNA damage induced protein phosphorylation                            | Chek1                 | 0.003287926    |
| GO:0048096                | chromatin-mediated maintenance of transcription                       | Chek1                 | 0.004694026    |
| GO:0070257                | positive regulation of mucus secretion                                | Syt12                 | 0.005162325    |
| GO:0045839                | negative regulation of mitotic nuclear division                       | Chek1                 | 0.005162325    |
| GO:2000279                | negative regulation of DNA biosynthetic process                       | Chek1                 | 0.006566021    |
| GO:0010569                | regulation of double-strand break repair via homologous recombination | Chek1                 | 0.007033519    |
| GO:0016601                | Rac protein signal transduction                                       | Eps811                | 0.009368012    |
| GO:0031572                | G2 DNA damage checkpoint                                              | Chek1                 | 0.009834312    |
| <b>Cellular Component</b> |                                                                       |                       |                |
| GO:0070382                | exocytic vesicle                                                      | Syt12                 | 0.005664978    |
| GO:0005657                | replication fork                                                      | Chek1                 | 0.009425405    |
| GO:0019897                | extrinsic component of plasma membrane                                | Syt12                 | 0.012705168    |
| GO:0042470                | melanosome                                                            | Syt12                 | 0.012705168    |
| GO:0030863                | cortical cytoskeleton                                                 | Mpp1                  | 0.015041809    |
| GO:0000794                | condensed nuclear chromosome                                          | Chek1                 | 0.019235097    |
| GO:0000781                | chromosome, telomeric region                                          | Chek1                 | 0.023875266    |
| GO:0032587                | ruffle membrane                                                       | Eps811                | 0.02526342     |
| GO:0001726                | ruffle                                                                | Eps811                | 0.034013467    |
| GO:0005604                | basement membrane                                                     | Papln                 | 0.04587151     |
| <b>Molecular Function</b> |                                                                       |                       |                |
| GO:0004629                | phospholipase C activity                                              | Plcb2                 | 0.004805373    |
| GO:0042043                | neurexin family protein binding                                       | Syt12                 | 0.006242886    |
| GO:0030676                | Rac guanyl-nucleotide exchange factor activity                        | Eps811                | 0.006721637    |
| GO:0042608                | T cell receptor binding                                               | Eps811                | 0.007678511    |
| GO:0004435                | phosphatidylinositol phospholipase C activity                         | Plcb2                 | 0.008634546    |
| GO:0003779                | actin binding                                                         | Eps811;Tns4           | 0.010618993    |
| GO:0001786                | phosphatidylserine binding                                            | Syt12                 | 0.011497631    |
| GO:0031683                | G-protein beta/gamma-subunit complex binding                          | Plcb2                 | 0.01197408     |
| GO:0008081                | phosphoric diester hydrolase activity                                 | Plcb2                 | 0.02240329     |
| GO:0005544                | calcium-dependent phospholipid binding                                | Syt12                 | 0.02240329     |

**Supplementary Table 11.** The top 10 enriched GO terms of DEGs between the KE and KO groups.

| <b>ID</b>                 | <b>GO term</b>                                                          | <b>Enriched genes</b>                                                     | <b>P value</b> |
|---------------------------|-------------------------------------------------------------------------|---------------------------------------------------------------------------|----------------|
| <b>Biological Process</b> |                                                                         |                                                                           |                |
| GO:0071493                | cellular response to UV-B                                               | Hyal2;Cdkn1a                                                              | 8.09E-05       |
| GO:0006977                | DNA damage response                                                     | Cdkn1a;Pidd1                                                              | 0.000118457    |
| GO:0043066                | negative regulation of apoptotic process                                | Mdm4;Bcl11b;Pidd1;Hspa1b;Cdkn1a                                           | 0.000407       |
| GO:2001238                | positive regulation of extrinsic apoptotic signaling pathway            | Hyal2;Pidd1                                                               | 0.000988155    |
| GO:0055085                | transmembrane transport                                                 | Itrp2;Oca2;Slc16a8;Kcnq5                                                  | 0.002144141    |
| GO:0032482                | Rab protein signal transduction                                         | Rab17;Rab19                                                               | 0.003786561    |
| GO:0006886                | intracellular protein transport                                         | Rab17;Rab19;Sytl2                                                         | 0.004540113    |
| GO:0006547                | histidine metabolic process                                             | Ftcd                                                                      | 0.008174517    |
| GO:0033153                | T cell receptor V(D)J recombination                                     | Bcl11b                                                                    | 0.008174517    |
| GO:0044027                | hypermethylation of CpG island                                          | Kcnq1ot1                                                                  | 0.008174517    |
| <b>Cellular Component</b> |                                                                         |                                                                           |                |
| GO:0042470                | melanosome                                                              | Rab17;Sytl2                                                               | 0.000635581    |
| GO:0005622                | intracellular                                                           | Bcl11b;Hspa1b;Eps811;Slfn9;<br>Cdkn1a;Rab17;Ift80                         | 0.001358343    |
| GO:0030139                | endocytic vesicle                                                       | Hyal2;Rab17                                                               | 0.002529989    |
| GO:0001726                | ruffle                                                                  | Eps811;Frmd4b                                                             | 0.004371725    |
| GO:0005886                | plasma membrane                                                         | D930015E06Rik;Hyal2;Veph1;Lima1;<br>Itrp2;Slc16a8;Glra3;Sytl2;Rab17;Rab19 | 0.010363304    |
| GO:0097458                | neuron part                                                             | Bcl11b                                                                    | 0.010611343    |
| GO:0000139                | Golgi membrane                                                          | Hyal2;Ftcd                                                                | 0.01112583     |
| GO:0000307                | cyclin-dependent protein kinase holoenzyme complex                      | Cdkn1a                                                                    | 0.013247104    |
| GO:0030686                | 90S preribosome                                                         | Gm6252                                                                    | 0.013247104    |
| GO:0070382                | exocytic vesicle                                                        | Sytl2                                                                     | 0.01587607     |
| <b>Molecular Function</b> |                                                                         |                                                                           |                |
| GO:0016934                | extracellular-glycine-gated chloride channel activity                   | Glra3                                                                     | 0.007847372    |
| GO:0015129                | lactate transmembrane transporter activity                              | Slc16a8                                                                   | 0.009149467    |
| GO:0051015                | actin filament binding                                                  | Lima1;Eps811                                                              | 0.010284424    |
| GO:0015278                | calcium-release channel activity                                        | Itrp2                                                                     | 0.010449909    |
| GO:0019912                | cyclin-dependent protein kinase activating kinase activity              | Cdkn1a                                                                    | 0.011748702    |
| GO:0004415                | hyaluronoglucosaminidase activity                                       | Hyal2                                                                     | 0.013045847    |
| GO:0008028                | monocarboxylic acid transmembrane transporter activity                  | Slc16a8                                                                   | 0.0156352      |
| GO:0042043                | neurexin family protein binding                                         | Sytl2                                                                     | 0.016927413    |
| GO:0004861                | cyclin-dependent protein serine/<br>threonine kinase inhibitor activity | Cdkn1a                                                                    | 0.016927413    |
| GO:0070679                | inositol 1,4,5 trisphosphate binding                                    | Itrp2                                                                     | 0.016927413    |

**Supplementary Table 12.** The top 10 enriched GO terms of DEGs between the WE and WT groups.

| ID                        | GO term                                                        | Enriched genes                                         | P value     |
|---------------------------|----------------------------------------------------------------|--------------------------------------------------------|-------------|
| <b>Biological Process</b> |                                                                |                                                        |             |
| GO:0006900                | membrane budding                                               | Trim72;Wasl;Vps4a                                      | 0.000156763 |
| GO:0051056                | regulation of small GTPase mediated signal transduction        | Iqsec3;Rap1gap2;Cdc42bpa                               | 0.0011777   |
| GO:0070588                | calcium ion transmembrane transport                            | Atp2c1;Oprm1;Loxhd1;Cacna1h;<br>Ryr1;Trpm1;Slc8b1      | 0.001319117 |
| GO:0071320                | cellular response to cAMP                                      | Igfbp5;Akap7;Egr3;Hcn1                                 | 0.001573349 |
| GO:0015914                | phospholipid transport                                         | Pitpnb;Atp11a;Pctp;Tmem30a                             | 0.002442009 |
| GO:2000344                | positive regulation of acrosome reaction                       | Cacna1h;Plb1                                           | 0.003180204 |
| GO:0070863                | positive regulation of protein exit from endoplasmic reticulum | Slc51b;Tmem30a                                         | 0.003180204 |
| GO:0045759                | negative regulation of action potential                        | Cnr2;Hcn1                                              | 0.003180204 |
| GO:0018119                | peptidyl-cysteine S-nitrosylation                              | S100a9;S100a8                                          | 0.003180204 |
| GO:0009804                | coumarin metabolic process                                     | Cyp2a5;Cyp2a4                                          | 0.003180204 |
| <b>Cellular Component</b> |                                                                |                                                        |             |
| GO:0042383                | sarcolemma                                                     | Oprm1;Trim72;Cacna1h;Ryr1;<br>Col6a2;Slc8b1            | 0.003030434 |
| GO:0016023                | cytoplasmic membrane-bounded vesicle                           | Hyal2;Sgk3;Axin2;Wasl;Chil3                            | 0.0046114   |
| GO:0090543                | Flemming body                                                  | Vps4a;Ist1                                             | 0.005601224 |
| GO:0000139                | Golgi membrane                                                 | Hyal2;Atp2c1;Xylt1;Wasl;Cogp1                          | 0.021606423 |
| GO:0005881                | cytoplasmic microtubule                                        | Cyp2a4;Cyp2a5;Axin2                                    | 0.030840161 |
| GO:0030992                | intraciliary transport particle B                              | Rabl2;Ttc30a2                                          | 0.032204495 |
| GO:0005871                | kinesin complex                                                | Kif5b;Kif12;Kif1c                                      | 0.033902314 |
| GO:0016607                | nuclear speck                                                  | Apex1;Dyrk1a;Ppih;1810011O10Rik                        | 0.034440442 |
| GO:0030139                | endocytic vesicle                                              | Rabep1;Kif5b;Hyal2                                     | 0.03711623  |
| GO:0016529                | sarcoplasmic reticulum                                         | Ryr1;Akap7;Syne2                                       | 0.038779671 |
| <b>Molecular Function</b> |                                                                |                                                        |             |
| GO:0035662                | Toll-like receptor 4 binding                                   | S100a9;S100a8                                          | 0.003349627 |
| GO:0016798                | hydrolase activity, acting on glycosyl bonds                   | Hyal2;Lyz1;Lyzl6;Tdg;Chil3                             | 0.004014281 |
| GO:0008536                | Ran GTPase binding                                             | Kpnb1;Xpo6;Rangrf                                      | 0.005512792 |
| GO:0043425                | bHLH transcription factor binding                              | Usf2;Ep300;Tcf4                                        | 0.006090798 |
| GO:0050786                | RAGE receptor binding                                          | S100a9;S100a8                                          | 0.006996174 |
| GO:0050544                | arachidonic acid binding                                       | S100a9;S100a8                                          | 0.006996174 |
| GO:0008565                | protein transporter activity                                   | Ap2b1;Kpnb1;Xpo6;Rangrf                                | 0.008477855 |
| GO:0003796                | lysozyme activity                                              | Lyz1;Lyzl6                                             | 0.008478305 |
| GO:0008017                | microtubule binding                                            | Kif1c;S100a9;Kif5b;Ppp5c;<br>S100a8;Ska2;Kif12         | 0.009382088 |
| GO:0019904                | protein domain specific binding                                | Vps4a;E2f4;Oprm1;Ist1;Akap7;<br>Kpnb1;Stx18;Ppp1r2;Tdg | 0.011967994 |

**Supplementary Table 13.** The top 10 enriched GO terms of DEGs between the KE and WT groups.

| <b>ID</b>                 | <b>GO term</b>                                                   | <b>Enriched genes</b>                                            | <b>P value</b> |
|---------------------------|------------------------------------------------------------------|------------------------------------------------------------------|----------------|
| <b>Biological Process</b> |                                                                  |                                                                  |                |
| GO:0048844                | artery morphogenesis                                             | Prrx1;Smad7;Nf1;Stra6;Hes1                                       | 0.000102012    |
| GO:0051056                | regulation of small GTPase mediated signal transduction          | Cdc42bpa;Rap1gap2;Iqsec3                                         | 0.002302552    |
| GO:0030325                | adrenal gland development                                        | Stra6;Nf1;Pdgfra                                                 | 0.004916793    |
| GO:0072711                | cellular response to hydroxyurea                                 | Rad51;Atrx                                                       | 0.005029769    |
| GO:0070863                | positive regulation of protein exit from endoplasmic reticulum   | Tmem30a;Slc51b                                                   | 0.005029769    |
| GO:0045759                | negative regulation of action potential                          | Cnr2;Hcn1                                                        | 0.005029769    |
| GO:0065004                | protein-DNA complex assembly                                     | Tcf4;Ep300                                                       | 0.006636052    |
| GO:0006900                | membrane budding                                                 | Wasl;Vps4a                                                       | 0.006636052    |
| GO:2000323                | negative regulation of glucocorticoid receptor signaling pathway | Phb;Cry1                                                         | 0.006636052    |
| GO:0017148                | negative regulation of translation                               | Paip2b;Tia1;Gigyf2;Trim71;Igfbp5                                 | 0.006900816    |
| <b>Cellular Component</b> |                                                                  |                                                                  |                |
| GO:0031527                | filopodium membrane                                              | Antxr1;Palm;Syne2                                                | 0.002901969    |
| GO:0031258                | lamellipodium membrane                                           | Antxr1;Syne2                                                     | 0.006918742    |
| GO:0005793                | endoplasmic reticulum-Golgi intermediate compartment             | Ptpn2;Rgmb;Nucb1;Ist1                                            | 0.008793303    |
| GO:0090543                | Flemming body                                                    | Vps4a;Ist1                                                       | 0.008800374    |
| GO:0000139                | Golgi membrane                                                   | Xylt1;Hyal2;Copg1;Wasl;Arfp1;Atp2c1                              | 0.015973912    |
| GO:0035102                | PRC1 complex                                                     | Phc2;Cbx8                                                        | 0.01826734     |
| GO:0000792                | heterochromatin                                                  | Phc2;Cbx8;Atrx                                                   | 0.020481389    |
| GO:0005798                | Golgi-associated vesicle                                         | Map6d1;Nucb1                                                     | 0.02108549     |
| GO:0005902                | microvillus                                                      | Lyz1;Hyal2;Spn;Pdgfra                                            | 0.023635841    |
| GO:0016363                | nuclear matrix                                                   | Zfp326;Scaf8;Runx1t1;Hes1                                        | 0.041483935    |
| <b>Molecular Function</b> |                                                                  |                                                                  |                |
| GO:0015026                | coreceptor activity                                              | Gfra4;Rgmb;Cd22                                                  | 0.003419784    |
| GO:0019904                | protein domain specific binding                                  | E2f4;Tdg;Ist1;Kpnb1;Akap7;Scaf8;Ppp1r2;Homer2;Stx18;Vps4a;Spn    | 0.007541022    |
| GO:0045545                | syndecan binding                                                 | Sema5a;Nf1                                                       | 0.008827046    |
| GO:0008022                | protein C-terminus binding                                       | Phb;Tcf4;Akap7;Ksr1;Pdzd11;Rad51;Ep300;Vps4a;Hcn1                | 0.009739438    |
| GO:0008536                | Ran GTPase binding                                               | Xpo6;Rangrf;Kpnb1                                                | 0.010378605    |
| GO:0043425                | bHLH transcription factor binding                                | Usf2;Tcf4;Ep300                                                  | 0.011438707    |
| GO:0031490                | chromatin DNA binding                                            | Apex1;Prdm14;Vax2;Ep300                                          | 0.011540636    |
| GO:0005515                | protein binding                                                  | Rab3d;Ksr1;Smad7;Gkap1;Ist1;Kcnq1ot1;Runx1t1;Sim1;Ptpn2;Cbx1;etc | 0.013121392    |
| GO:0004629                | phospholipase C activity                                         | Plcb2;Plcd4                                                      | 0.01319896     |
| GO:0032403                | protein complex binding                                          | Mb21d2;Casp3;Kpnb1;Ist1;Otof;Pdgfra;Ppfia2;Ins2;Ep300;Apex1;etc  | 0.014087821    |

**Supplementary Table 14.** The top 10 enriched GO terms of DEGs between the KE and WE groups.

| <b>ID</b>                 | <b>GO term</b>                                              | <b>Enriched genes</b>     | <b>P value</b> |
|---------------------------|-------------------------------------------------------------|---------------------------|----------------|
| <b>Biological Process</b> |                                                             |                           |                |
| GO:0031077                | post-embryonic camera-type eye development                  | Bcl11b                    | 0.007665899    |
| GO:0010574                | regulation of vascular endothelial growth factor production | Ccr2                      | 0.007665899    |
| GO:0010837                | regulation of keratinocyte proliferation                    | Bcl11b                    | 0.007665899    |
| GO:0019725                | cellular homeostasis                                        | Ccr2                      | 0.007665899    |
| GO:0033153                | T cell receptor V(D)J recombination                         | Bcl11b                    | 0.007665899    |
| GO:0006003                | fructose 2,6-bisphosphate metabolic process                 | Gck                       | 0.007665899    |
| GO:0031584                | activation of phospholipase D activity                      | Hpca                      | 0.008938013    |
| GO:0002829                | negative regulation of type 2 immune response               | Ccr2                      | 0.008938013    |
| GO:0032811                | negative regulation of epinephrine secretion                | Gck                       | 0.008938013    |
| GO:0045627                | positive regulation of T-helper 1 cell differentiation      | Ccr2                      | 0.008938013    |
| <b>Cellular Component</b> |                                                             |                           |                |
| GO:0008250                | oligosaccharyltransferase complex                           | Tusc3                     | 0.008992746    |
| GO:0097458                | neuron part                                                 | Bcl11b                    | 0.010271025    |
| GO:0045180                | basal cortex                                                | Gck                       | 0.010271025    |
| GO:0044327                | dendritic spine head                                        | Hpca                      | 0.012822804    |
| GO:0005765                | lysosomal membrane                                          | Tmem192;Oca2              | 0.018663317    |
| GO:0032839                | dendrite cytoplasm                                          | Hpca                      | 0.028000441    |
| GO:0005768                | endosome                                                    | Tmem192;Rab17;<br>Zfyve28 | 0.02954089     |
| GO:0042470                | melanosome                                                  | Rab17                     | 0.03425766     |
| GO:0032590                | dendrite membrane                                           | Hpca                      | 0.03425766     |
| GO:0032809                | neuronal cell body membrane                                 | Hpca                      | 0.03425766     |
| <b>Molecular Function</b> |                                                             |                           |                |
| GO:0004396                | hexokinase activity                                         | Gck                       | 0.007065876    |
| GO:0004340                | glucokinase activity                                        | Gck                       | 0.007065876    |
| GO:0005536                | glucose binding                                             | Gck                       | 0.01524864     |
| GO:0016493                | C-C chemokine receptor activity                             | Ccr2                      | 0.01757462     |
| GO:0015095                | magnesium ion transmembrane transporter activity            | Tusc3                     | 0.01757462     |
| GO:0031210                | phosphatidylcholine binding                                 | Pctp                      | 0.019895309    |
| GO:0019955                | cytokine binding                                            | Ccr2                      | 0.023366447    |
| GO:0005540                | hyaluronic acid binding                                     | Lyve1                     | 0.027976222    |
| GO:0004950                | chemokine receptor activity                                 | Ccr2                      | 0.029125387    |
| GO:0032266                | phosphatidylinositol-3-phosphate binding                    | Zfyve28                   | 0.03370898     |

**Supplementary Table 15.** Common KEGG terms emerged in both comparisons.

| <b>ID</b>                     | <b>KEGG term</b>           | <b>Enriched genes<br/>(KO VS WT)</b> | <b>Enriched genes<br/>(KE VS KO)</b> |
|-------------------------------|----------------------------|--------------------------------------|--------------------------------------|
| <b>Up-regulated pathway</b>   |                            |                                      |                                      |
| mmu04115                      | p53 signaling pathway      | Chek1                                | Cdkn1a, Mdm4, Pidd1                  |
| <b>Down-regulated pathway</b> |                            |                                      |                                      |
| mmu04730                      | Long-term depression       | Plcb2                                | Itpr2                                |
| mmu04915                      | Estrogen signaling pathway | Plcb2                                | Itpr2, Hspa1b                        |

**Supplementary Table 16.** The top 20 enriched KEGG terms of DEGs between the KO and WT groups.

| <b>ID</b> | <b>KEGG term</b>                                          | <b>Count</b> | <b>PopHit</b> | <b>Enriched</b> | <b>P value</b> |
|-----------|-----------------------------------------------------------|--------------|---------------|-----------------|----------------|
| mmu05143  | African trypanosomiasis                                   | 1            | 36            | Plcb2           | 0.009128992    |
| mmu04973  | Carbohydrate digestion and absorption                     | 1            | 43            | Plcb2           | 0.01085139     |
| mmu04961  | Endocrine and other factor-regulated calcium reabsorption | 1            | 54            | Plcb2           | 0.013554988    |
| mmu04730  | Long-term depression                                      | 1            | 61            | Plcb2           | 0.015273533    |
| mmu04115  | p53 signaling pathway                                     | 1            | 67            | Chek1           | 0.016745379    |
| mmu04720  | Long-term potentiation                                    | 1            | 67            | Plcb2           | 0.016745379    |
| mmu04924  | Renin secretion                                           | 1            | 72            | Plcb2           | 0.017971077    |
| mmu00562  | Inositol phosphate metabolism                             | 1            | 72            | Plcb2           | 0.017971077    |
| mmu04918  | Thyroid hormone synthesis                                 | 1            | 73            | Plcb2           | 0.018216124    |
| mmu04971  | Gastric acid secretion                                    | 1            | 74            | Plcb2           | 0.018461142    |
| mmu04970  | Salivary secretion                                        | 1            | 78            | Plcb2           | 0.019440905    |
| mmu04911  | Insulin secretion                                         | 1            | 85            | Plcb2           | 0.021154313    |
| mmu04540  | Gap junction                                              | 1            | 86            | Plcb2           | 0.021398963    |
| mmu04925  | Aldosterone synthesis and secretion                       | 1            | 86            | Plcb2           | 0.021398963    |
| mmu04912  | GnRH signaling pathway                                    | 1            | 89            | Plcb2           | 0.02213273     |
| mmu04915  | Estrogen signaling pathway                                | 1            | 96            | Plcb2           | 0.023843784    |
| mmu04713  | Circadian entrainment                                     | 1            | 98            | Plcb2           | 0.024332381    |
| mmu04070  | Phosphatidylinositol signaling system                     | 1            | 98            | Plcb2           | 0.024332381    |
| mmu04916  | Melanogenesis                                             | 1            | 100           | Plcb2           | 0.024820856    |
| mmu04933  | AGE-RAGE signaling pathway in diabetic complications      | 1            | 100           | Plcb2           | 0.024820856    |

Note: Count, the number of genes enriched in specific KEGG terms; PopHit, Population Hit, the number of genes annotated in specific KEGG terms.

**Supplementary Table 17.** The top 20 enriched KEGG terms of DEGs between the KE and KO groups.

| <b>ID</b> | <b>KEGG term</b>                                  | <b>Count</b> | <b>PopHit</b> | <b>Enriched genes</b> | <b>P value</b> |
|-----------|---------------------------------------------------|--------------|---------------|-----------------------|----------------|
| mmu04115  | p53 signaling pathway                             | 3            | 67            | Cdkn1a;Mdm4;Pidd1     | 7.11E-05       |
| mmu04210  | Apoptosis                                         | 3            | 136           | Itpr2;Pidd1;Bcl2a1c   | 0.000544095    |
| mmu04915  | Estrogen signaling pathway                        | 2            | 96            | Itpr2;Hspa1b          | 0.006126744    |
| mmu04064  | NF-kappa B signaling pathway                      | 2            | 104           | Pidd1;Bcl2a1c         | 0.007135674    |
| mmu04725  | Cholinergic synapse                               | 2            | 113           | Itpr2;Kcnq5           | 0.008355333    |
| mmu04921  | Oxytocin signaling pathway                        | 2            | 153           | Cdkn1a;Itpr2          | 0.014816667    |
| mmu05202  | Transcriptional misregulation in cancer           | 2            | 177           | Cdkn1a;Bcl2a1c        | 0.019466689    |
| mmu04218  | Cellular senescence                               | 2            | 187           | Cdkn1a;Itpr2          | 0.021566129    |
| mmu00670  | One carbon pool by folate                         | 1            | 19            | Ftcd                  | 0.024444178    |
| mmu05167  | Kaposi's sarcoma-associated herpesvirus infection | 2            | 204           | Cdkn1a;Itpr2          | 0.025345465    |
| mmu05205  | Proteoglycans in cancer                           | 2            | 206           | Cdkn1a;Itpr2          | 0.025807118    |
| mmu00531  | Glycosaminoglycan degradation                     | 1            | 21            | Hyal2                 | 0.02685877     |
| mmu05169  | Epstein-Barr virus infection                      | 2            | 220           | Cdkn1a;Hspa1b         | 0.029136503    |
| mmu00340  | Histidine metabolism                              | 1            | 25            | Ftcd                  | 0.031671824    |
| mmu05206  | MicroRNAs in cancer                               | 2            | 281           | Cdkn1a;Mdm4           | 0.045523727    |
| mmu05219  | Bladder cancer                                    | 1            | 41            | Cdkn1a                | 0.050710538    |
| mmu05134  | Legionellosis                                     | 1            | 58            | Hspa1b                | 0.070569428    |
| mmu04730  | Long-term depression                              | 1            | 61            | Itpr2                 | 0.074034863    |
| mmu04213  | Longevity regulating pathway-multiple species     | 1            | 62            | Hspa1b                | 0.075187421    |
| mmu05214  | Glioma                                            | 1            | 64            | Cdkn1a                | 0.077488665    |

Note: Count, the number of genes enriched in specific KEGG terms; PopHit, Population Hit, the number of genes annotated in specific KEGG terms.



**Supplementary Table 18.** The top 20 enriched KEGG terms of DEGs between the WE and WT groups.

| ID       | KEGG term                                              | Count | PopHit | Enriched genes                                              | P value     |
|----------|--------------------------------------------------------|-------|--------|-------------------------------------------------------------|-------------|
| mmu04144 | Endocytosis                                            | 10    | 286    | Vps4a;Gm8909;Kif5b;Ist1;Iqsec3;H2-Q1;Rabep1;Eea1;Wasl;Ap2b1 | 0.010638002 |
| mmu03410 | Base excision repair                                   | 3     | 35     | Apex1;Hmgb1;Tdg                                             | 0.017352165 |
| mmu05203 | Viral carcinogenesis                                   | 8     | 231    | Gm8909;Hist1h2bb;Ep300;Pik3cd;H2-Q1;Casp3;Ranbp1;Egr3       | 0.022632799 |
| mmu03013 | RNA transport                                          | 6     | 167    | Gm9839;AF366264;Kpnb1;Upf3b;Eif3j2;Eif1                     | 0.039646722 |
| mmu00515 | Mannose type O-glycan biosynthesis                     | 2     | 23     | Large;B3galnt2                                              | 0.050373382 |
| mmu04977 | Vitamin digestion and absorption                       | 2     | 24     | Lrat;Plb1                                                   | 0.054065857 |
| mmu00563 | Glycosylphosphatidylinositol (GPI)-anchor biosynthesis | 2     | 25     | Pigb;Pigg                                                   | 0.057851097 |
| mmu04950 | Maturity onset diabetes of the young                   | 2     | 27     | Hes1;Ins2                                                   | 0.065686286 |
| mmu04922 | Glucagon signaling pathway                             | 4     | 102    | Phka1;Ep300;Gcgr;Plcb2                                      | 0.067782835 |
| mmu05210 | Colorectal cancer                                      | 3     | 62     | Casp3;Axin2;Pik3cd                                          | 0.067995381 |
| mmu04310 | Wnt signaling pathway                                  | 5     | 146    | Gm9839;Plcb2;Ep300;Axin2;AF366264                           | 0.068196654 |
| mmu05016 | Huntington's disease                                   | 6     | 194    | Cox7c;Plcb2;Dnal1;Ep300;Casp3;Ap2b1                         | 0.070358373 |
| mmu05146 | Amoebiasis                                             | 4     | 106    | Plcb2;Casp3;Serpib6c;Pik3cd                                 | 0.075455761 |
| mmu04932 | Non-alcoholic fatty liver disease (NAFLD)              | 5     | 151    | Cox7c;Mlx;Pik3cd;Ins2;Casp3                                 | 0.076084982 |
| mmu04931 | Insulin resistance                                     | 4     | 109    | Mlx;Pik3cd;Ins2;Ppp1r3b                                     | 0.081487103 |
| mmu04940 | Type I diabetes mellitus                               | 3     | 70     | H2-Q1;Ins2;Gm8909                                           | 0.089243539 |
| mmu04520 | Adherens junction                                      | 3     | 72     | Wasl;Ep300;Pvrl4                                            | 0.094944201 |
| mmu05100 | Bacterial invasion of epithelial cells                 | 3     | 76     | Elmo1;Wasl;Pik3cd                                           | 0.106779222 |
| mmu04960 | Aldosterone-regulated sodium reabsorption              | 2     | 38     | Pik3cd;Ins2                                                 | 0.114048583 |
| mmu04068 | FoxO signaling pathway                                 | 4     | 132    | Ins2;Ep300;Pik3cd;Sgk3                                      | 0.135038658 |

Note: Count, the number of genes enriched in specific KEGG terms; PopHit, Population Hit, the number of genes annotated in specific KEGG terms.

**Supplementary Table 19.** The top 20 enriched KEGG terms of DEGs between the KE and WT groups.

| ID       | KEGG term                                              | Count | PopHit | Enriched genes                                                                   | P value     |
|----------|--------------------------------------------------------|-------|--------|----------------------------------------------------------------------------------|-------------|
| mmu04144 | Endocytosis                                            | 12    | 286    | Eea1;ErbB4;Ist1;Pdgfra;Gm8909;<br>H2-Q1;Kif5b;Rabep1;Ap2b1;<br>Wasl;Vps4a;Iqsec3 | 0.005018707 |
| mmu00563 | Glycosylphosphatidylinositol (GPI)-anchor biosynthesis | 3     | 25     | Pigg;Pigb;Pign                                                                   | 0.011800954 |
| mmu00640 | Propanoate metabolism                                  | 3     | 31     | Pcca;Dbt;Abat                                                                    | 0.020011716 |
| mmu05016 | Huntington's disease                                   | 8     | 194    | Casp3;Polr2l;Plcb2;Ap2b1;Ep300;<br>Cox7c;Sdha;Dnal1                              | 0.022609904 |
| mmu03410 | Base excision repair                                   | 3     | 35     | Tdg;Apex1;Hmgb1                                                                  | 0.026853535 |
| mmu04066 | HIF-1 signaling pathway                                | 5     | 105    | Pik3cd;Ins2;Ep300;Pkg1;Rps6kb1                                                   | 0.040315982 |
| mmu04931 | Insulin resistance                                     | 5     | 109    | Ppp1r3b;Pik3cd;Ins2;Mlx;Rps6kb1                                                  | 0.045846837 |
| mmu04932 | Non-alcoholic fatty liver disease (NAFLD)              | 6     | 151    | Casp3;Pik3cd;Ins2;Mlx;Cox7c;Sdha                                                 | 0.052647317 |
| mmu01521 | EGFR tyrosine kinase inhibitor resistance              | 4     | 80     | Pik3cd;Nf1;Rps6kb1;Pdgfra                                                        | 0.05576429  |
| mmu04630 | Jak-STAT signaling pathway                             | 6     | 159    | Pik3cd;Ifna14;Ptpn2;Ep300;<br>Il21r;Il22ra1                                      | 0.06394295  |
| mmu04350 | TGF-beta signaling pathway                             | 4     | 85     | E2f4;Smad7;Rps6kb1;Ep300                                                         | 0.066184875 |
| mmu04666 | Fc gamma R-mediated phagocytosis                       | 4     | 87     | Wasl;Limk1;Rps6kb1;Pik3cd                                                        | 0.070618462 |
| mmu05215 | Prostate cancer                                        | 4     | 87     | Pik3cd;Ins2;Pdgfra;Ep300                                                         | 0.070618462 |
| mmu05221 | Acute myeloid leukemia                                 | 3     | 55     | Pik3cd;Runx1t1;Rps6kb1                                                           | 0.076950579 |
| mmu04621 | NOD-like receptor signaling pathway                    | 6     | 168    | Gm5136;Ifna14;Irak4;Plcb2;<br>Naip7;Antxr1                                       | 0.078236332 |
| mmu04514 | Cell adhesion molecules (CAMs)                         | 6     | 169    | Cd276;Gm8909;H2-Q1;Icosl;<br>Spn;Cd22                                            | 0.079927829 |
| mmu00280 | Valine, leucine and isoleucine degradation             | 3     | 56     | Pcca;Dbt;Abat                                                                    | 0.080099124 |
| mmu04068 | FoxO signaling pathway                                 | 5     | 132    | Pik3cd;Sgk3;Homer2;Ins2;Ep300                                                    | 0.086039782 |
| mmu04950 | Maturity onset diabetes of the young                   | 2     | 27     | Ins2;Hes1                                                                        | 0.087690663 |
| mmu05169 | Epstein-Barr virus infection                           | 7     | 220    | Pik3cd;Polr2l;Gm8909;H2-Q1;<br>Ep300;Spn;Adrm1                                   | 0.094860112 |

Note: Count, the number of genes enriched in specific KEGG terms; PopHit, Population Hit, the number of genes annotated in specific KEGG terms.

**Supplementary Table 20.** The top 20 enriched KEGG terms of DEGs between the KE and WE groups.

| <b>ID</b> | <b>KEGG term</b>                                    | <b>Count</b> | <b>PopHit</b> | <b>Enriched genes</b> | <b>P value</b> |
|-----------|-----------------------------------------------------|--------------|---------------|-----------------------|----------------|
| mmu00524  | Neomycin, kanamycin and gentamicin biosynthesis     | 1            | 5             | Gck                   | 0.003703243    |
| mmu00400  | Phenylalanine, tyrosine and tryptophan biosynthesis | 1            | 8             | Lao1                  | 0.005550745    |
| mmu00360  | Phenylalanine metabolism                            | 1            | 23            | Lao1                  | 0.014747192    |
| mmu04950  | Maturity onset diabetes of the young                | 1            | 27            | Gck                   | 0.01718805     |
| mmu00052  | Galactose metabolism                                | 1            | 32            | Gck                   | 0.020232317    |
| mmu00500  | Starch and sucrose metabolism                       | 1            | 33            | Gck                   | 0.020840264    |
| mmu00250  | Alanine, aspartate and glutamate metabolism         | 1            | 37            | Lao1                  | 0.023269036    |
| mmu00350  | Tyrosine metabolism                                 | 1            | 39            | Lao1                  | 0.024481613    |
| mmu00380  | Tryptophan metabolism                               | 1            | 46            | Lao1                  | 0.028716153    |
| mmu00270  | Cysteine and methionine metabolism                  | 1            | 48            | Lao1                  | 0.029923316    |
| mmu04930  | Type II diabetes mellitus                           | 1            | 48            | Gck                   | 0.029923316    |
| mmu00510  | N-Glycan biosynthesis                               | 1            | 49            | Tusc3                 | 0.030526448    |
| mmu00520  | Amino sugar and nucleotide sugar metabolism         | 1            | 49            | Gck                   | 0.030526448    |
| mmu01100  | Metabolic pathways                                  | 3            | 1316          | Gck;Lao1;Tusc3        | 0.03337417     |
| mmu00280  | Valine, leucine and isoleucine degradation          | 1            | 56            | Lao1                  | 0.034739974    |
| mmu05230  | Central carbon metabolism in cancer                 | 1            | 64            | Gck                   | 0.039537479    |
| mmu00010  | Glycolysis / Gluconeogenesis                        | 1            | 66            | Gck                   | 0.04073387     |
| mmu04917  | Prolactin signaling pathway                         | 1            | 72            | Gck                   | 0.04431589     |
| mmu04911  | Insulin secretion                                   | 1            | 85            | Gck                   | 0.052040231    |
| mmu04922  | Glucagon signaling pathway                          | 1            | 102           | Gck                   | 0.062065844    |

Note: Count, the number of genes enriched in specific KEGG terms; PopHit, Population Hit, the number of genes annotated in specific KEGG terms.
